# Supplementary material
Source: publisher site journal article supplement (http://www.degruyter.com/publication/journal_key/HC/downloadAsset/HC_Instructions%20for%20Authors.pdf)
Supplement: Supplementary file 1 [file HC_Instructions%20for%20Authors.pdf]

# Instructions for Authors

---

## Scope

*Heterocyclic Communications* is an international peer-reviewed, open access journal that publishes original research, reviews and news in the areas of chemistry, biochemistry, and clinical chemistry of various types of heterocyclic compounds. Our central goal is to provide a hub for researchers working across the mentioned scope to present their discoveries, and to be a forum for the discussion of the important issues in the field. The journal accommodates a variety of exposition styles and formats to help scientists with diverse backgrounds interact.

## Editorial Policy

### Unpublished material

Submission of a manuscript implies that the work described is not copyrighted, published or submitted elsewhere, except in abstract form. The corresponding author should ensure that all authors approve the manuscript before its submission.

### Conflict of interest

When authors submit a manuscript, they are responsible for recognizing and disclosing financial and/or other conflicts of interest that might bias their work and/or could inappropriately influence his/her judgment. If no specified acknowledgement is given, the Editors assume that no conflict of interest exists.

### Copyright

All authors retain copyright, unless – due to their local circumstances – their work is not copyrighted. The non-commercial use of each article will be governed by the [Creative-Commons Attribution Only license \(CC-BY\)](#) which is compliant with Plan-S. Scanned copy of license should be sent to the journal, as soon as possible.

### Authorship

Authorship should be limited to those who have made a significant contribution to the conception, design, execution, or interpretation of the reported study. All those who have made significant contributions should be listed as co-authors. Where there are others who have participated in certain substantive aspects of the research project, they should be named in an Acknowledgement section.

### Peer Review process

The Editors reserve the right to decline the submitted manuscript without review, if the studies reported are not sufficiently novel or important to merit publication in the journal. Manuscripts deemed unsuitable (insufficient originality or of limited interest to the target audience) are returned to the author(s) without review. The Editor seeks advice from experts in the appropriate field. Research articles and communications are refereed by a minimum of two reviewers, review papers by at least three. The journal uses a single-blind peer review model. Authors are requested to suggest persons competent to review their manuscript. However, please note that this will be treated only as a suggestion, and the final selection of reviewers is exclusively the Editor's decision. The final decision of acceptance is made by Managing Editor or, in case of conflict, by the Editor-in-Chief.

### Data sharing policy

Effective December 2020, the journal requires authors to follow [data sharing policy](#). Research data should be made widely available to the research community in order to demonstrate the robustness and validity of the research presented in the journal, to encourage replication of the results, and to provide the community with opportunities to learn. By publishing in the journal authors are required to provide a data availability statement (DAS) in their articles. Authors are encouraged to share their data but not required to. The decision to publish will not be affected by whether or not authors share their research data.

### Scientific Misconduct

This journal publishes only original manuscripts that are not also published or going to be published elsewhere. Multiple submissions/publications, or redundant publications (re-packaging in different words of data already published by the same authors) will be rejected. If they are detected only after publication, the journal reserves the right to publish a Retraction Note. In each particular case Editors will follow [COPE's Code of Conduct](#) and implement its advice.

## Electronic Submission

*Heterocyclic Communications* encourages the submission of both substantial full-length bodies of work and shorter manuscripts that report novel findings. There are no specific length restrictions for the overall manuscript or individual sections; however, we urge the authors to present and discuss their findings in a concise and accessible manner. All submitted manuscripts must be written in English language.

Manuscripts submitted under multiple authorship are reviewed on the assumption that all listed authors concur in the submission and are responsible for its content; they must have agreed to its publication and have given the corresponding author the authority to act on their behalf in all matters pertaining to publication. The corresponding author is responsible for informing the co-authors of the manuscript status throughout the submission, review, and production process.

All submissions must be made via online submission system <https://www.editorialmanager.com/hcc/default.aspx>. In case of problems, please contact the Managing Editor of this journal ([Izabela.Zarczynska@degruyter.com](mailto:Izabela.Zarczynska@degruyter.com)).

### Publication Formats

*Heterocyclic Communications* considers submissions of:

- Research Articles,
- Communications,
- Rapid Communications\*,
- Reviews, and Commentaries
- Letters to the Editor,
- Erratum,

\*Rapid Communications are intended to present information of exceptional novelty and exciting results of significant interest to the readers. Authors are asked to provide an explanation in the cover letter why their contribution should be handled via the rapid channel

### Electronic Formats Allowed

We accept submission of text, tables and figures as separate files or as a composite file. For your initial submission, we recommend you upload your entire manuscript, including tables and figures, as a single PDF file. If you are invited to submit a revised manuscript, please provide us with individual files: an editable text and publication-quality figures.

- Text files can be submitted in the following formats:

- MS Word – standard DOCUMENT (.DOC)
- RICH TEXT FORMAT (.RTF)
- PDF (not applicable for re-submitted or accepted manuscripts, see below).

• Tables should be submitted as MS Word or PDF (not applicable for re-submitted or accepted manuscripts, see below). Please note that a straight Excel file is not an acceptable format.

• Graphics files can be submitted in any of the following graphic formats: EPS; BMP; JPG; TIFF; GIF or PDF. Please note that PowerPoint files are not accepted.

Post-acceptance, text files of the revised manuscript and tables are required for use in the production. Authors should clearly indicate the location(s) of tables and figures in the text if these elements are given separately or at the end of the manuscript. If this information is not provided to the editorial office, we will assume that they should be left at the end of the text.

### First-Time Submission of Manuscripts

It is important that authors include a cover letter with their manuscript. Please explain why you consider your manuscript to be suitable for publication in *Heterocyclic Communications*, why your paper will inspire the other members of your field, and how will it drive academic discussion forward.

The cover letter should explicitly state that the manuscript (or one with substantially the same content, by any of the authors) has not been previously published in any language anywhere and that it is not under simultaneous consideration or in press by another journal. If related work has been submitted, then we may require a preprint to be made available. Reviewers will be asked to comment on the overlap between the related submissions.

Manuscripts that have been previously rejected, or withdrawn after being returned for modification, may be resubmitted if the major criticisms have been addressed. The cover letter must state that the manuscript is a resubmission, and the former manuscript number should be provided.

To ensure fair and objective decision-making, authors must declare any associations that pose a conflict of interest in connection with evaluated manuscripts.

### Submission of Revised Articles

Resubmitted manuscripts should be accompanied by a letter outlining a point-by-point response to Editor's and reviewers' comments and detailing the changes made to the manuscript. A copy of the original manuscript should be

included for comparison if the Editor requests one. If it is the first revision, authors need to return the revised manuscript within 14 days; if it is the second revision, authors need to return the revised manuscript within 7 days. Additional time for resubmission must be requested in advance. If the above-mentioned deadlines are not met, the manuscript will be treated as a new submission.

For resubmitted manuscripts, please provide us with an editable text and publication-quality figures. Supply any figures as separate high-resolution, print-ready digital versions.

In addition to the editorial remarks, authors are asked to take care that they have prepared the revised version according to the Journal's style.

## Organization of the Manuscript

We draw particular attention to the importance of carefully preparing the title, keywords and abstract, as these elements are indicators of the manuscript content in bibliographic databases and search engines.

### Title

We suggest the title should be informative, specific to the project, yet concise (75 characters or fewer). Please bear in mind that a title that is comprehensible to a broad academic audience and readers outside your field will attract a wider readership. Avoid specialist abbreviations and non-standard acronyms. Titles should not be presented in title case (words should not be capitalized). Please also provide a brief "running title" of not more than 50 characters.

### Authors, Affiliations, Addresses

In the cover letter, provide the first names (or initials – if used), middle names (or initials – if used), and surnames for all authors. Affiliations should include:

- Department
- University or organization
- City
- Postal code
- State/province (if applicable)
- Country

One of the authors should be designated as the corresponding author to whom inquiries regarding the paper should be directed. It is the corresponding author's responsibility to ensure that the author list and the summary of the author contributions to the study are accurate and complete.

### Abstract

The abstract should not exceed 200 words. The abstract should give a summary of the content of the paper. Mention the main findings without going into methodological detail and summarize briefly the most important items of the paper. Because the abstract will be published separately by abstracting services, it must be complete and understandable without reference to the text.

### Keywords

List keywords for the work presented (maximum of 5), separated by commas. We suggest that keywords do not replicate those used in the title.

### Formatting and Typesetting

All pages must be numbered consecutively. The whole text (including legends, footnotes, and references) should be formatted double-spaced with no hyphenation and automatic word-wrap (no hard returns within paragraphs). Please type your text consistently, e.g. take care to distinguish between '1' (one), 'I' (capital I) and 'l' (lower-case L) and '0' (zero) and 'O' (capital O), etc. Manuscript pages should have line numbers. The font size should be no smaller than 12 points.

Footnotes and endnotes should be avoided. Allowable footnotes/endnotes may include: the designation of the corresponding author of the paper, the current address of an author (if different from that shown in the affiliation), abbreviations and acronyms.

### Symbols and abbreviations

The use of special symbols, abbreviations, and acronyms is permitted so long as they are defined upon first mention in the article.

## Nomenclature

Authors should consult the ACS Style Guide, 3rd Edition, American Chemical Society, Washington, DC, 2006, for nomenclature and format guidelines.

## Cover letter

Each manuscript should be accompanied by a cover letter to the Editor-in-Chief containing a brief statement by the authors regarding the element of novelty of their research.

**Preliminary Communications** should be subdivided into Title page, Abstract (up to 200 words), Keywords, a single section of main text without headings, Experimental details, Acknowledgments, References, Tables, numbered freestanding structures and/or Schemes (without legends), Figures and Figure legends.

**Research Articles** must present an accurate description of the research conducted and an objective discussion. The title should clearly identify the subject of the reported work. On the title page full names of all authors must be given with the name of the corresponding author marked by an asterisk (\*), institution addresses, e-mail address of the corresponding author, and a short (running) title. The second page should contain an abstract (up to 200 words) and up to 6 Keywords. The order of sections is: Introduction, Results and discussion, Conclusions, Experimental, Acknowledgments, References, Tables, numbered free-standing structures (without legends), Schemes (with or without legends), Figures and Figure legends (if applicable).

**Review Articles** should be arranged to have a Title page, Abstract (up to 200 words), Keywords, a short Table of Contents followed by the main text with appropriate headings/subheadings (3 levels are possible), Acknowledgments, References, Tables, structures, Schemes, Figures and Figure legends. Reviews can be up to 20 printed pages in length but shorter reviews on important topics are welcome.

## Compound synthesis

The Experiment Section of Research Articles and a short section 'Experimental Details' of Preliminary Communications must include a description of experimental methodology that permits repetition of the work by other chemists. However, duplication of the methods reported in other publications, unless substantially modified, is not permitted. Description of a general procedure for the synthesis of a series of products is strongly encouraged. Characterization of each compound prepared by using the general procedure must be presented according to the following example:

**5-Methyl-7-(N-methylpiperazino)benzo[b]furan hydrobromide (4e)** The free base was obtained in 46% yield as a colorless oil; <sup>1</sup>H NMR (400 MHz, CDCl<sub>3</sub>): δ 7.58 (d, 1H, J = 2.0 Hz), 7.00 (d, 1H, J = 7.8 Hz), 6.63 (d, 1H, J = 7.8 Hz), 6.77 (d, 1H, J = 2.0 Hz), 3.21 (m, 4H), 2.66 (m, 4H), 2.46 (s, 3H), 2.39 (s, 3H); <sup>13</sup>C NMR (100 MHz, CDCl<sub>3</sub>): δ 154.9, 144.3, 143.3, 125.3, 119.9, 115.7, 109.8, 105.5, 55.4, 51.4, 46.2, 14.6. A hydrobromide salt: mp 212 – 213 °C (dec). Anal. Calcd for C<sub>14</sub>H<sub>18</sub>N<sub>2</sub>O•2 HBr: C, 42.88; H, 5.14; N, 7.14. Found: C, 42.76; H, 5.20; N, 7.14.

Give the full name of the compound followed by a number. Experimental evidence for identity and degree of purity must be presented for all new compounds. Combustion elemental analysis is preferred, but high-resolution mass spectrometric data for the molecular ion is acceptable if supported by <sup>1</sup>H NMR and <sup>13</sup>C NMR spectra showing compound homogeneity.

A **Compound Characterization Checklist** should be provided if the manuscript reports characterization data for new compounds or known compounds prepared by a new or modified method.

A file of supplemental information should be submitted along with the manuscript. This file must contain all the compound characterizations data such as <sup>1</sup>H NMR, <sup>13</sup>C NMR, IR, HRMS to insure the purity of the synthesized compounds.

**Chemical structures** should be produced with the use of a drawing program such as Chem Draw.

## Abbreviations

The use of abbreviations and acronyms is permitted provided they are defined the first time they are used. The generally accepted abbreviations for chemical groups such as Me, Et, Bu, Ph should not be defined.

## Units

The following units should be used: mol, mmol, cm, cm<sup>-1</sup>, Å, kg, g, mg, L, mL, eV, Hz, ppm, °C.

## References

- Within the text references must be numbered consecutively in square brackets [ ] as they are cited.

Example: "(...) supported by studies and DFT calculations [21]."

If citing more than one reference at a time, please list each reference number separated by a comma, or by a dash for a sequence of consecutive numbers. There should be no spaces between commas or dashes.

Example: [1,7,21]

Example: [3-5]

Example: [1,4,7-11]

The references must be ordered with ascending numbers. References should be listed and numbered in the order that they appear in the text. References in figure captions and tables should be listed after references in the text.

Please format your references to **Vancouver/ICMJE style**.

**The general format is** Last Name First Initial Second Initial (if available), Last Name First Initial Second Initial (if available). Title. Journal. Year; Volume(Issue): Pages. (pages separated by a long dash)

*Example:* [1] Yosuke I, Nishino H. Synthesis of macrocyclic amides using manganese(III)-based intramolecular cyclization of N- ( $\omega$ -alkenyl)-3-oxobutanamides. Heterocycl Commun. 2009;15:467-71.

- Follow these examples carefully for all layout, punctuation, spacing and capitalization.
- Enter author's surname followed by one or more initials.
- If more than 1 author: give all authors' names and separate each by a comma and space **If there are more than six authors, list the first six authors, followed by et al.**
- Journal titles are abbreviated. Journal abbreviations should be those used in the Chemical Abstracts Service Source Index (CASSI) 1907-2004 Cumulative and its supplements.
- Give the volume number (no space) followed by the issue number (if available) in brackets, page numbers. Abbreviate page numbers where possible, e.g., 1329-49, 351-56.

More examples:

## Articles in journals

[1] Chuit C, Corriu RJ, Reye C, Young JC. Reactivity of penta- and hexacoordinate silicon compounds and their role as reaction intermediates. Chem Rev. 1993;93(4):1371-448.

[2] Vaejosaari SE, Skrypai V, Suating P, Hurley JJ, De Lio AM, Gilbert TM, et al. Simple Metal-Free Direct Reductive Amination Using Hydrosilatrane to Form Secondary and Tertiary Amines. Adv Synth Catal. 2017;359:1872-78.

## Journal articles published online ahead of print

[3] Abou-Hassan A, Sandre O, Cabuil V. Microfluidics in inorganic chemistry. Angew Chem. Int. Ed. 2010, published ahead of print; DOI: 10.1002/anie.200904285

## Books and Monographs

[4] Anastas PT, Warner JC. Green Chemistry: Theory and Practice; Oxford University Press: Oxford, 1998.

## Chapters

[5] Stepl BA, George KF. Antifreezes and Deicing Fluids. In Kirk-Othmer Encyclopedia of Chemical Technology; 4th Ed. Howe-Grant, M., Ed. Wiley-Interscience: New York, 1992;3,347-67.

## Tables

Submit tables on separate pages and number them consecutively using Arabic numerals. Provide a short descriptive title, column headings, and (if necessary) footnotes to make each table self-explanatory. Refer to tables in the text as Table 1, 2, etc. Use Table 1, etc. in the table legends. In setting up tables, please consider the type area of Heterocycl. Commun. (17~23.5 cm) and the column width (8.2 cm).

## Figures

All illustrations must be of reproduction-ready quality. They will be reduced in size to fit, whenever possible, the width of a single column. Lettering of all figures within the article should be uniform in style (preferably a sans serif typeface

like Arial) and of sufficient size (ca. 8 pt.). Uppercase letters A, B, C, etc. should be used to identify parts of multi-part figures. Cite all figures in the text in numerical order. Do not embed figures within the text body of the manuscript.

Figures are graphs, spectra, diagrams, and similar illustrations. In the Figure legends provide a short descriptive title and a legend to make each figure self-explanatory on separate pages. Explain all symbols used in the figures. Remember to use the same abbreviations as in the text body.

**Halftone figures** (gray scale and color) should have a minimum resolution of 300 dpi and be of good contrast. Authors are encouraged to submit illustrations in color if necessary for conveying their scientific content. Publication of color figures is provided free of charge.

### Chemical structures

Free standing blocks of structures and Schemes should be drawn using the ChemDraw software with 'ACS Document 1996' settings. A scheme contains one or more arrows and is labeled as 'Scheme' at the bottom. All individual structures must be numbered with boldface Arabic numbers in the order in which the compounds are first mentioned in the text. Boldface lowercase letters may be used following the numbers, for example **2a**, **3a,b**, **6a-d**. The particular structure must appear only once. The identical compound in Schemes must be designated with its structure number alone after its first drawing as a structure. We request that Arial 10 point should be used for atom labels and captions with the following settings for the structures: fixed length 14.4 pt (0.508 cm); bold width 2 pt (0.071 cm); line width 0.6 pt (0.021 cm); margin width 1.6 pt (0.056 cm); hash spacing 2.5 pt (0.088 cm); chain angle 120 degrees; bond spacing 18% of length (2.59 pt). Authors using different drawing programs are requested to use settings consistent with those indicated above. Single-column artwork should not exceed 11.5 cm (4.5 inches) in width and 23 cm (9 inches) for double-column graphical elements.

The artwork prepared in ChemDraw should be copied and pasted into the manuscript text file. The use of graphical formats (jpg, gif, tiff, bmp etc.) for chemical structures is not acceptable. Additionally, authors must provide ChemDraw cdx source files for Figures and Schemes separately.

### Permissions

It is the authors' responsibility to obtain permission to reproduce original or modified material that has been previously published.

### Supplementary information

For new materials, authors should provide mass spectral data in the supplementary information.

### Acknowledgments

This section should describe recognition of personal assistance: people who contributed to the work, but do not fit the criteria for authors should be listed along with their contributions. You must ensure that anyone named in the acknowledgments agrees to being so named.

### Author's Statements

This section should describe:

- any funding information, including the role of the study sponsor(s), if any, in study design, collection, analysis, and interpretation of data, writing the paper and decision to submit it for publication;
- authors contribution - if required;
- conflict of interest;
- Data Availability Statement.

Please refer to Author's Statement document at:

[https://www.degruyter.com/publication/journal\\_key/BIOL/downloadAsset/BIOL\\_Author%20Statements.pdf](https://www.degruyter.com/publication/journal_key/BIOL/downloadAsset/BIOL_Author%20Statements.pdf)

## Outline of the Production Process

Once an article has been accepted for publication, the manuscript files are transferred into our production system to be language-edited and formatted. Language and technical editors reserve the privilege of editing manuscripts to conform with the stylistic conventions of the journal. Once the article has been typeset, PDF proofs are generated so that authors can approve all editing and layout.

### Immediate Publication

Manuscripts ready for publication are promptly posted online. The manuscripts are considered to be ready for publication when the final proofreading has been performed by authors, and all concerns have been resolved. Authors should notice that no changes can be made to the articles after online publication.
